# Supplementary material for: Acute Hemodynamic Effects of Riociguat in Patients With Pulmonary Hypertension Associated With Diastolic Heart Failure (DILATE-1): A Randomized, Double-Blind, Placebo-Controlled, Single-Dose Study
Source: PubMed Central journal article supplement — Chest. 2014 Jul 3;146(5):1274–85. doi: 10.1378/chest.14-0106 (PMC4219342; doi:10.1378/chest.14-0106), 2014-07-03
Supplement: chest_146_5_1274_ds01.pdf [file chest_146_5_1274_ds01.pdf]

# Acute Hemodynamic Effects of Riociguat in Patients With Pulmonary Hypertension Associated With Diastolic Heart Failure (DILATE-1)

## A Randomized, Double-Blind, Placebo-Controlled, Single-Dose Study

*Diana Bonderman, MD; Ingrid Pretsch, MD; Regina Steringer-Mascherbauer, MD; Pavel Jansa, MD; Stephan Rosenkranz, MD; Caroline Tufaro, MS; Andja Bojic, MD; Carolyn S. P. Lam, MD; Reiner Frey, MD; Michael Ochan Kilama, MD; Sigrun Unger, MSc; Lothar Roessig, MD; and Irene M. Lang, MD*

CHEST 2014; 146(5):1274–1285

### **e-Appendix 1.**

#### *Supplemental methods*

#### *Inclusion and exclusion criteria*

Inclusion criteria included: signs or symptoms of heart failure; echocardiographic confirmation of preserved left ventricular ejection fraction (LVEF) > 50%; echocardiographic confirmation of preserved ejection fraction with LVEF > 50% and evidence for diastolic dysfunction, by either abnormal relaxation (E/A wave ratio < 1) or diastolic stiffness (E/A wave ratio > 2) in patients with sinus rhythm, or by E wave deceleration time < 150 ms in patients with atrial fibrillation; serum N-terminal prohormone of brain natriuretic peptide (NT-proBNP) > 220 µg/mL; and mean pulmonary artery pressure ≥ 25 mm Hg and pulmonary arterial wedge pressure > 15 mm Hg at rest. The main exclusion criteria were: pretreatment within 30 days of randomization with intravenous vasodilators, endothelin receptor antagonists, prostanoids, or phosphodiesterase-5 inhibitors; treatment within 7 days of randomization with nitric oxide donors; pulmonary hypertension of groups other than Dana Point Classification 2.2; systolic blood pressure >180 mm Hg or <95 mm Hg and /or diastolic blood pressure >110 mm Hg; significant coronary, carotid, or peripheral vascular disease. Patients with significant valvular heart disease were excluded.

#### *Exploratory analysis of myocardial O<sub>2</sub> consumption*

Myocardial O<sub>2</sub> (MVO<sub>2</sub>) consumption was estimated with the Rooke-Feigl formula as  $MVO_2 = 0.000408 * SBP * \text{heart rate (HR)} + 0.000325 * (0.8 * SBP + 0.2 * DBP) * HR * \text{stroke volume (SV)} / \text{Body weight} + 1.43$ .<sup>1</sup>

*Online supplements are not copyedited prior to posting.*

### *Exploratory biomarker analysis*

Serum NT-proBNP levels and the exploratory biomarkers galectin-3, procollagen type III, ST2, and asymmetric dimethylarginine were assessed at baseline, 8, and 24 h post-study drug administration.

### *Pharmacokinetic analysis*

Plasma concentrations of riociguat were determined during the 24-h period following study drug administration using validated high performance liquid chromatography-mass spectrometry. The following parameters were calculated using WinNonlin Version 4.1 (Pharsight Corporation, Mountain View, CA, USA): area under the plasma concentration–time curve (AUC) from zero to infinity; AUC/dose; AUC divided by dose per kg body weight; peak plasma concentration ( $C_{max}$ );  $C_{max}$ /dose; time to reach maximum drug concentration in plasma ( $t_{max}$ ); and half-life ( $t_{1/2}$ ).

*Adverse events*  
AEs were defined as any event that started or worsened following administration of the single dose of study medication up until 2 days after administration.

The following adverse events were of special interest: decrease in invasively measured systemic systolic arterial blood pressure < 80 mm Hg or systemic mean arterial blood pressure < 60 mm Hg at any time during the study; decrease in cardiac output  $\geq$  20% of baseline; pulmonary edema; and syncope.

### SUPPLEMENTAL REFERENCES

1. Rooke GA, Feigl EO. Work as a correlate of canine left ventricular oxygen consumption, and the problem of catecholamine oxygen wasting. *Circ Res.* 1982;50(2):273-286.

*Online supplements are not copyedited prior to posting.*

**e-Figure 1.** Geometric mean plasma concentration–time curves over 24 h following single doses of riociguat (0.5, 1, and 2 mg). Non-compartmental pharmacokinetic analyses were performed on plasma concentrations of riociguat.

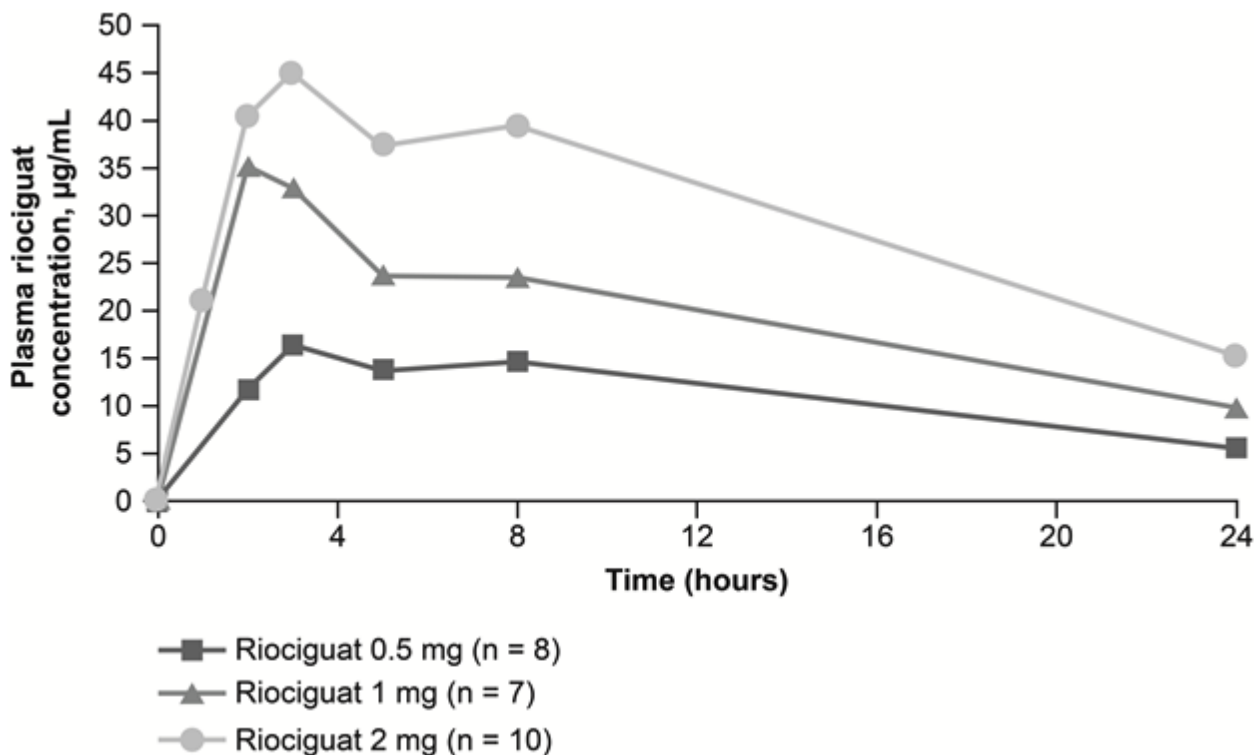

**e-Table 1—Baseline Values (Standard Deviation) and Peak Changes from Baseline in Mean Pulmonary Artery Pressure**

| Group                    | Baseline, mm Hg (SD) | Peak change from baseline, mm Hg (SD) | Difference vs placebo, mm Hg (SD) | P-value <sup>a</sup> |
|--------------------------|----------------------|---------------------------------------|-----------------------------------|----------------------|
| Placebo (n = 11)         | 34.9±8.0             | -6.3±4.2                              | -                                 | -                    |
| Riociguat 0.5 mg (n = 8) | 32.0±4.5             | -4.3±3.0                              | 2.0±3.7                           | .3                   |
| Riociguat 1 mg (n = 7)   | 31.1±6.4             | -2.4±5.7                              | 3.8±4.8                           | .1                   |
| Riociguat 2 mg (n = 10)  | 35.1±8.8             | -5.1±4.7                              | 1.2±4.4                           | .6                   |

<sup>a</sup>Two-group, two-sided *t* test.  
SD = standard deviation.

*Online supplements are not copyedited prior to posting.*

**e-Table 2—Changes (Least Squares Mean) from Baseline in Secondary Hemodynamic Parameters**

| Parameter                                                                  | Treatment        | Change | Standard error | P-value <sup>a</sup> |
|----------------------------------------------------------------------------|------------------|--------|----------------|----------------------|
| Cardiac index,<br>L/min/m <sup>-2</sup>                                    | Placebo          | 0.04   | 0.1            | .6                   |
|                                                                            | Riociguat 0.5 mg | 0.1    | 0.1            | .2                   |
|                                                                            | Riociguat 1 mg   | 0.3    | 0.1            | .007                 |
|                                                                            | Riociguat 2 mg   | 0.5    | 0.1            | <.0001               |
| Cardiac output,<br>L/min                                                   | Placebo          | 0.08   | 0.2            | .7                   |
|                                                                            | Riociguat 0.5 mg | 0.3    | 0.2            | .2                   |
|                                                                            | Riociguat 1 mg   | 0.6    | 0.2            | .01                  |
|                                                                            | Riociguat 2 mg   | 1.0    | 0.2            | <.0001               |
| Diastolic blood pressure,<br>mm Hg                                         | Placebo          | -2.4   | 1.9            | .2                   |
|                                                                            | Riociguat 0.5 mg | -2.4   | 2.2            | .3                   |
|                                                                            | Riociguat 1 mg   | -5.8   | 2.4            | .02                  |
|                                                                            | Riociguat 2 mg   | -8.7   | 2.0            | .0001                |
| Systolic blood pressure,<br>mm Hg                                          | Placebo          | -2.1   | 3.6            | .6                   |
|                                                                            | Riociguat 0.5 mg | -2.8   | 4.3            | .5                   |
|                                                                            | Riociguat 1 mg   | -16.3  | 4.6            | .001                 |
|                                                                            | Riociguat 2 mg   | -13.7  | 3.8            | .001                 |
| Heart rate, bpm                                                            | Placebo          | 2.3    | 2.3            | .3                   |
|                                                                            | Riociguat 0.5 mg | 0.9    | 2.7            | .7                   |
|                                                                            | Riociguat 1 mg   | -0.2   | 2.8            | 1.0                  |
|                                                                            | Riociguat 2 mg   | 4.6    | 2.4            | .06                  |
| Stroke volume,<br>mL                                                       | Placebo          | 0.6    | 2.9            | .8                   |
|                                                                            | Riociguat 0.5 mg | 5.2    | 3.4            | .1                   |
|                                                                            | Riociguat 1 mg   | 4.0    | 3.6            | .3                   |
|                                                                            | Riociguat 2 mg   | 9.4    | 3.0            | .004                 |
| Stroke volume index, mL/m <sup>2</sup>                                     | Placebo          | 0.4    | 1.4            | .8                   |
|                                                                            | Riociguat 0.5 mg | 2.6    | 1.7            | .1                   |
|                                                                            | Riociguat 1 mg   | 2.2    | 1.8            | .2                   |
|                                                                            | Riociguat 2 mg   | 4.6    | 1.5            | .005                 |
| Systemic vascular resistance,<br>dyn·s·cm <sup>-5</sup>                    | Placebo          | -90    | 82             | .3                   |
|                                                                            | Riociguat 0.5 mg | -113   | 97             | .3                   |
|                                                                            | Riociguat 1 mg   | -366   | 103            | .001                 |
|                                                                            | Riociguat 2 mg   | -336   | 86             | .0005                |
| Systemic vascular resistance index, dyn·s·cm <sup>-5</sup> ·m <sup>2</sup> | Placebo          | -170   | 153            | .3                   |
|                                                                            | Riociguat 0.5 mg | -229   | 179            | .2                   |
|                                                                            | Riociguat 1 mg   | -691   | 191            | .001                 |
|                                                                            | Riociguat 2 mg   | -624   | 160            | .0005                |
| Pulmonary vascular                                                         | Placebo          | -4.6   | 21.0           | .8                   |
|                                                                            | Riociguat 0.5    | -5.7   | 24.6           | .8                   |

*Online supplements are not copyedited prior to posting.*

|                                                   |                     |       |      |        |
|---------------------------------------------------|---------------------|-------|------|--------|
| resistance,<br>dyn·s·cm <sup>-5</sup>             | mg                  |       |      |        |
|                                                   | Riociguat 1 mg      | -28.2 | 26.3 | .3     |
|                                                   | Riociguat 2 mg      | -20.8 | 22.0 | .4     |
| Pulmonary<br>vascular<br>resistance               | Placebo             | -6.4  | 38.7 | .9     |
|                                                   | Riociguat 0.5<br>mg | -13.1 | 45.4 | .8     |
| index, dyn·s·cm <sup>-5</sup> ·m <sup>2</sup>     | Riociguat 1 mg      | -53.2 | 48.5 | .3     |
|                                                   | Riociguat 2 mg      | -39.4 | 40.6 | .3     |
| Pulmonary<br>arterial wedge<br>pressure,<br>mm Hg | Placebo             | -2.8  | 0.9  | .007   |
|                                                   | Riociguat 0.5<br>mg | -1.7  | 1.1  | .1     |
| Right atrial<br>pressure,<br>mm Hg                | Riociguat 1 mg      | 0.1   | 1.2  | 1.0    |
|                                                   | Riociguat 2 mg      | -2.9  | 1.0  | .006   |
| Mean arterial<br>pressure,<br>mm Hg               | Placebo             | -0.9  | 1.0  | .4     |
|                                                   | Riociguat 0.5<br>mg | -0.7  | 1.2  | .6     |
|                                                   | Riociguat 1 mg      | 0.5   | 1.3  | .7     |
|                                                   | Riociguat 2 mg      | -1.7  | 1.1  | .1     |
|                                                   | Placebo             | -4.3  | 2.5  | .1     |
|                                                   | Riociguat 0.5<br>mg | -4.1  | 3.0  | .2     |
|                                                   | Riociguat 1 mg      | -9.3  | 3.2  | .006   |
|                                                   | Riociguat 2 mg      | -12.3 | 2.6  | <.0001 |
| Mixed venous<br>oxygen<br>saturation, %           | Placebo             | 1.2   | 1.5  | .4     |
|                                                   | Riociguat 0.5<br>mg | -1.1  | 1.7  | .5     |
|                                                   | Riociguat 1 mg      | 3.1   | 2.0  | .1     |
|                                                   | Riociguat 2 mg      | 2.5   | 1.6  | .1     |
| Transpulmonary<br>pressure<br>gradient, mm<br>Hg  | Placebo             | -0.1  | 1.0  | .9     |
|                                                   | Riociguat 0.5<br>mg | 0.4   | 1.2  | .8     |
|                                                   | Riociguat 1 mg      | 0.9   | 1.3  | .5     |
|                                                   | Riociguat 2 mg      | 0.7   | 1.1  | .5     |

<sup>a</sup>Paired *t* test.

*Online supplements are not copyedited prior to posting.*

**e-Table 3—Baseline Values (Standard Deviation) and Changes (Least Squares Mean) from Baseline in Post-hoc Hemodynamic Parameters**

| Parameter (SD)                                         | Placebo (n = 11) |        | Riociguat      |        |              |                    | Treatment difference (95% CI) <sup>a</sup> | P-value <sup>a</sup> |                        |        |
|--------------------------------------------------------|------------------|--------|----------------|--------|--------------|--------------------|--------------------------------------------|----------------------|------------------------|--------|
|                                                        |                  |        | 0.5 mg (n = 8) |        | 1 mg (n = 7) |                    |                                            |                      | 2 mg (n = 10)          |        |
|                                                        | Baseline         | Change | Baseline       | Change | Baseline     | Change             |                                            |                      | Baseline               | Change |
| Diastolic pressure gradient, mm Hg                     | 3.4 ±3.2         | 1.2    | 2.1±4.1        | 1.0    | 1.1±3.0      | 3.0                | 1.3±2.4                                    | 2.5                  | 1.3<br>(-1.6 to 4.2)   | .4     |
| Pulmonary arterial pulse pressure, mm Hg               | 29.8±14.2        | 2.3    | 28.0±8.6       | 1.1    | 29.4±16.6    | -2.4               | 31.2±13.2                                  | -1.9                 | -4.1<br>(-9.1 to 0.8)  | .1     |
| Systemic arterial pulse pressure, mm Hg                | 67.2±17.3        | 0.3    | 85.9±21.9      | -0.4   | 83.7±15.3    | -10.5 <sup>b</sup> | 82.9±21.9                                  | -5.1                 | -5.4<br>(-14.3 to 3.5) | .2     |
| Systemic arterial compliance, mL.mm Hg <sup>-1</sup>   | 1.0±0.6          | -0.01  | 1.0±0.2        | 0.06   | 0.9±0.4      | 0.2 <sup>c</sup>   | 1.0±0.4                                    | 0.2                  | 0.2<br>(0.02 to 0.4)   | .03    |
| Pulmonary arterial capacitance, mL.mm Hg <sup>-1</sup> | 2.7±1.9          | -0.3   | 3.1±0.8        | 0.06   | 3.4±2.4      | 0.6                | 2.6±1.1                                    | 0.4                  | 0.7<br>(-0.1 to 1.5)   | .1     |
| Right ventricular stroke work, g·m                     | 22.6±20.2        | -3.9   | 24.8±5.7       | 0.6    | 19.7±11.9    | 2.0                | 25.0±14.5                                  | 2.5                  | 6.4<br>(-0.7 to 13.5)  | .07    |

*Online supplements are not copyedited prior to posting.*



|                                               |           |      |           |     |           |      |           |       |                        |    |
|-----------------------------------------------|-----------|------|-----------|-----|-----------|------|-----------|-------|------------------------|----|
| Left ventricular stroke work, g·m             | 52.8±19.0 | -1.4 | 72.3±16.7 | 1.3 | 72.5±39.4 | -6.7 | 65.1±31.3 | -3.9  | -2.4<br>(-11.2 to 6.4) | .6 |
| Myocardial O <sub>2</sub> consumption, mL/min | 6.9±1.5   | 0.06 | 7.6±1.6   | 0   | 8.2±2.0   | -0.5 | 7.8±1.5   | -0.04 | -0.1<br>(-0.9 to 0.7)  | .8 |

<sup>a</sup>Riociguat 2 mg vs placebo.

<sup>b</sup>Treatment difference: -10.8 (95% CI: -20.7 to -1.0); *P* = .03.

<sup>c</sup>Treatment difference: 0.2 (95% CI: 0.02 to 0.4); *P* = .03.

The mean changes from baseline of all evaluations up to 6 h after study drug administration are shown.

*Online supplements are not copyedited prior to posting.*

**e-Table 4—Baseline-Adjusted Analysis of Changes (Least Squares Mean) in Selected Hemodynamic Parameters**

| Parameter (SD)                                       | Placebo (n = 11) |        | Riociguat      |        |              |        |               |        | Treatment difference (95% CI) <sup>a</sup> | P-value <sup>a</sup> |
|------------------------------------------------------|------------------|--------|----------------|--------|--------------|--------|---------------|--------|--------------------------------------------|----------------------|
|                                                      |                  |        | 0.5 mg (n = 8) |        | 1 mg (n = 7) |        | 2 mg (n = 10) |        |                                            |                      |
|                                                      | Baseline         | Change | Baseline       | Change | Baseline     | Change | Baseline      | Change |                                            |                      |
| Stroke volume, mL                                    | 66.6±34.0        | 0.4    | 81.5±18.0      | 5.4    | 77.8±36.7    | 4.1    | 75.1±27.1     | 9.4    | 9.0 (0.4 to 17.7)                          | .04                  |
| Stroke volume index, mL/m <sup>2</sup>               | 34.2±14.3        | 0.2    | 42.9±7.9       | 2.9    | 39.1±17.1    | 2.2    | 38.4±10.4     | 4.6    | 4.4 (0.1 to 8.7)                           | .04                  |
| Systemic vascular resistance, dyn·s·cm <sup>-5</sup> | 1583±689         | -32    | 1246±392       | -152   | 1352±795     | -375   | 1294±481      | -362   | -329 (-524 to -135)                        | .002                 |
| Systemic arterial compliance, mL/mm Hg               | 1.0±0.6          | 0      | 1.0±0.2        | 0.1    | 0.9±0.4      | 0.2    | 1.0±0.4       | 0.2    | 0.2 (0.01 to 0.4)                          | .04                  |
| Cardiac output, L/min                                | 4.2±1.9          | 0.1    | 5.0±0.7        | 0.3    | 5.2±1.9      | 0.6    | 4.9±1.5       | 1.0    | 0.9 (0.3 to 1.5)                           | .002                 |
| Cardiac index, L/min/m <sup>2</sup>                  | 2.2±0.8          | 0      | 2.7±0.5        | 0.2    | 2.6±0.9      | 0.3    | 2.5±0.5       | 0.5    | 0.5 (0.2 to 0.7)                           | .0003                |
| Filling resistance, mm Hg/(L/min)                    | 5.5±2.3          | -0.7   | 3.8±0.7        | -0.8   | 4.9±4.0      | -0.7   | 4.7±1.4       | -1.3   | -0.6 (-1.1 to -0.1)                        | .03                  |
| Systolic blood pressure, mm Hg                       | 129.5 ±20.2      | -4.0   | 143.3 ±19.3    | -1.9   | 144.7 ±22.8  | -15.2  | 141.6 ±24.9   | -13.2  | -9.2 (-19.7 to 1.2)                        | .08                  |

*Online supplements are not copyedited prior to posting.*





|                                 |           |      |           |      |           |      |           |       |                         |      |
|---------------------------------|-----------|------|-----------|------|-----------|------|-----------|-------|-------------------------|------|
| Diastolic blood pressure, mm Hg | 62.3±11.9 | -1.7 | 57.4±9.7  | -3.2 | 61.0±10.2 | -5.5 | 58.7±11.2 | -9.1  | -7.4<br>(-12.1 to -2.7) | .003 |
| Mean arterial pressure, mm Hg   | 83.9±15.9 | -4.7 | 85.0±11.9 | -4.1 | 86.0±13.1 | -9.0 | 85.6±14.8 | -12.1 | -7.5<br>(-13.8 to -1.2) | .02  |

<sup>a</sup>Riociguat 2 mg vs placebo.

The mean changes from baseline of all evaluations up to 6 h after study drug administration are shown.

*Online supplements are not copyedited prior to posting.*

**e-Table 5—Baseline Values (Standard Deviation) and Changes (Least Squares Mean) from Baseline in Echocardiographic Parameters**

| Parameter (SD)                                                 | Placebo |               |        | Riociguat |               |        |      |               |        |      |               |        | Treatment difference (95% CI) <sup>a</sup> | P-value <sup>a</sup> |
|----------------------------------------------------------------|---------|---------------|--------|-----------|---------------|--------|------|---------------|--------|------|---------------|--------|--------------------------------------------|----------------------|
|                                                                | n       | BL            | Change | 0.5 mg    |               |        | 1 mg |               |        | 2 mg |               |        |                                            |                      |
|                                                                | n       | BL            | Change | n         | BL            | Change | n    | BL            | Change | n    | BL            | Change |                                            |                      |
| Left ventricular end-diastolic volume, mL                      | 10      | 77.9<br>±38.4 | 2.1    | 7         | 99.0<br>±33.9 | -13.0  | 6    | 94.7<br>±20.7 | 1.4    | 10   | 99.2<br>±39.4 | -5.7   | -7.8<br>(-22.9 to 7.4)                     | .3                   |
| Left ventricular end-diastolic volume index, mL/m <sup>2</sup> | 10      | 40.9<br>±18.2 | 0.7    | 7         | 49.9<br>±14.5 | -6.4   | 6    | 48.1<br>±8.0  | 0.01   | 10   | 50.8<br>±16.5 | -3.3   | -4.1<br>(-11.5 to 3.4)                     | .3                   |
| Left ventricular end-systolic volume, mL                       | 10      | 29.7<br>±16.3 | 3.8    | 7         | 41.7<br>±16.6 | -5.4   | 6    | 35.3<br>±8.2  | -0.1   | 10   | 35.0<br>±14.0 | -4.3   | -8.0<br>(-17.5 to 1.4)                     | .09                  |
| Left ventricular ejection fraction, %                          | 10      | 62.2<br>±5.5  | -3.0   | 7         | 57.8<br>±8.3  | 0.5    | 6    | 62.8<br>±1.3  | 0.1    | 10   | 64.5<br>±8.5  | 2.3    | 5.3<br>(-1.7 to 12.3)                      | .1                   |
| Left atrial area, cm <sup>2</sup>                              | 11      | 23.7<br>±5.8  | 1.7    | 7         | 26.3<br>±5.9  | -1.8   | 7    | 25.3<br>±7.2  | -0.9   | 10   | 26.6<br>±6.4  | -2.3   | -4.0<br>(-8.1 to 0.1)                      | .06                  |
| Right ventricular end-diastolic area, cm <sup>2</sup>          | 11      | 18.6<br>±8.4  | 2.8    | 7         | 17.8<br>±5.1  | -0.8   | 5    | 25.3<br>±10.8 | -1.7   | 10   | 23.8<br>±11.5 | -2.8   | -5.6<br>(-10.9 to -0.3)                    | .04                  |

*Online supplements are not copyedited prior to posting.*



|                                                                                                      |    |                |       |   |                |      |   |               |      |    |                |      |                        |    |
|------------------------------------------------------------------------------------------------------|----|----------------|-------|---|----------------|------|---|---------------|------|----|----------------|------|------------------------|----|
| Right ventricular end-systolic area, cm <sup>2</sup>                                                 | 11 | 14.3<br>±8.7   | -1.0  | 7 | 9.7<br>±2.8    | 1.0  | 5 | 17.4<br>±9.3  | -2.7 | 10 | 15.0<br>±9.7   | 1.9  | 2.8<br>(-2.2 to 7.9)   | .3 |
| Right atrial area, cm <sup>2</sup>                                                                   | 11 | 23.4<br>±5.1   | 1.1   | 7 | 23.4<br>±6.2   | -1.1 | 7 | 26.3<br>±5.8  | -4.9 | 10 | 24.9<br>±3.7   | 0.4  | -0.7<br>(-4.8 to 3.4)  | .7 |
| Systolic pulmonary arterial pressure, mm Hg                                                          | 11 | 56.3<br>±18.7  | -0.5  | 7 | 57.6<br>±10.6  | -3.8 | 5 | 50.2<br>±20.1 | 4.7  | 10 | 52.2<br>±12.9  | -1.1 | -0.5<br>(-6.4 to 5.4)  | .9 |
| Tricuspid annular plane systolic excursion, mm                                                       | 11 | 17.4<br>±3.3   | 0.9   | 7 | 21.2<br>±4.7   | -0.3 | 5 | 17.6<br>±4.5  | -2.1 | 9  | 19.1<br>±7.1   | 0.6  | -0.2<br>(-2.6 to 2.1)  | .8 |
| Mitral peak velocity of early filling (rest), cm/s                                                   | 7  | 104.8<br>±37.4 | 3.6   | 6 | 118.0<br>±58.7 | 0.8  | 4 | 71.3<br>±29.4 | 11.0 | 8  | 105.0<br>±16.5 | -3.8 | -7.4<br>(-23.2 to 8.3) | .3 |
| Mitral peak velocity of late filling (rest) <sup>b</sup> , cm/s                                      | 3  | 53.0<br>±21.4  | 3.3   | 3 | 50.9<br>±8.8   | 2.4  | 2 | 73.0<br>±10.2 | 12.9 | 6  | 66.0<br>±43.7  | -2.1 | -5.3<br>(-16.5 to 5.8) | .3 |
| Mitral peak velocity of early filling/mitral peak velocity of late filling ratio (rest) <sup>b</sup> | 3  | 2.0<br>±1.2    | -0.01 | 3 | 1.4<br>±0.2    | 0.06 | 2 | 0.8<br>±0.2   | 0.04 | 6  | 2.0<br>±0.9    | 0.1  | 0.1<br>(-0.2 to 0.5)   | .4 |

*Online supplements are not copyedited prior to posting.*



|                                     |    |                |      |   |                |      |   |                |     |   |                |      |                          |    |
|-------------------------------------|----|----------------|------|---|----------------|------|---|----------------|-----|---|----------------|------|--------------------------|----|
| E-wave deceleration time (rest), ms | 11 | 153.6<br>±53.4 | 23.1 | 6 | 158.7<br>±31.3 | 16.4 | 5 | 154.5<br>±42.4 | 5.1 | 7 | 176.6<br>±69.1 | -7.0 | -30.1<br>(-70.2 to 10.0) | .1 |
|-------------------------------------|----|----------------|------|---|----------------|------|---|----------------|-----|---|----------------|------|--------------------------|----|

<sup>a</sup>Riociguat 2 mg vs placebo.

<sup>b</sup>A only measured in patients with sinus rhythm.

The mean changes from baseline of all evaluations up to 6 h after study drug administration are shown.

BL = baseline.

*Online supplements are not copyedited prior to posting.*

**e-Table 6—Baseline Values (Standard Deviation) and Changes (Least Squares Mean) from Baseline in Plasma Biomarkers**

| Parameter (SD)             | Placebo (n = 11)        |        | Riociguat      |        |              |        |               |        | Treatment difference (95% CI) <sup>a</sup> | P-value <sup>a</sup> |
|----------------------------|-------------------------|--------|----------------|--------|--------------|--------|---------------|--------|--------------------------------------------|----------------------|
|                            |                         |        | 0.5 mg (n = 8) |        | 1 mg (n = 7) |        | 2 mg (n = 10) |        |                                            |                      |
|                            | Baseline                | Change | Baseline       | Change | Baseline     | Change | Baseline      | Change |                                            |                      |
| NT-proBNP, pg/mL           | 2019 ±1383              | -43    | 1422 ±1371     | 80     | 848±55<br>3  | 151    | 1976 ±2496    | 889    | 933<br>(-380 to 2245)                      | .2                   |
| Procollagen type III, U/mL | 1.3±0.4 <sup>b</sup>    | 0.01   | 1.4±0.4        | 0.1    | 1.2±0.5      | 0.1    | 1.1±0.3       | 0.2    | 0.2<br>(0.03 to 0.3)                       | .02                  |
| ADMA, μmol/L               | 0.56±0.14               | 0.01   | 0.48±0.08      | 0      | 0.74±0.08    | -0.03  | 0.48±0.06     | 0      | -0.02<br>(-0.08 to 0.04)                   | .6                   |
| ST2, ng/mL                 | 21.5 ±16.8 <sup>b</sup> | -0.3   | 18.3±7.0       | 0.7    | 14.4±4.3     | 6.4    | 26.9±18.2     | 2.8    | 3.1<br>(-5.5 to 11.6)                      | .5                   |
| Galectin-3, ng/mL          | 8.5±1.8 <sup>b</sup>    | 0.1    | 9.2±4.0        | 0.1    | 6.8±2.3      | -0.02  | 8.8±2.5       | 0.7    | 0.6<br>(-1.0 to 2.2)                       | .5                   |

<sup>a</sup>Riociguat 2 mg vs placebo.

<sup>b</sup>n = 10.

The mean changes from baseline of the evaluations at 8 and 24 h after study drug administration are shown.

ADMA = asymmetric dimethylarginine; NT-proBNP = N-terminal prohormone of brain natriuretic peptide.

*Online supplements are not copyedited prior to posting.*

**e-Table 7—Pharmacokinetic Parameters of Riociguat**

| Parameter                                 | Riociguat 0.5 mg (n = 8) |        |            | Riociguat 1 mg (n = 7) |        |              | Riociguat 2 mg (n = 10) |        |              |
|-------------------------------------------|--------------------------|--------|------------|------------------------|--------|--------------|-------------------------|--------|--------------|
|                                           | Geometric mean           | CV (%) | Range      | Geometric mean         | CV (%) | Range        | Geometric mean          | CV (%) | Range        |
| AUC, $\mu\text{g}\cdot\text{h}/\text{L}$  | 396.2                    | 86.9   | 98.8–859.7 | 689.2                  | 102.0  | 188.7–3060.0 | 1041.7 <sup>a</sup>     | 45.1   | 580.5–2507.9 |
| AUC/D, H/L                                | 0.8                      | 86.9   | 0.2–1.7    | 0.7                    | 102.0  | 0.2–3.1      | 0.5 <sup>a</sup>        | 45.1   | 0.3–1.3      |
| C <sub>max</sub> , $\mu\text{g}/\text{L}$ | 21.7                     | 36.8   | 13.0–37.4  | 40.1                   | 55.7   | 18.8–74.7    | 69.0                    | 37.4   | 42.2–123.7   |
| C <sub>max</sub> /D, L <sup>-1</sup>      | 0.04                     | 36.8   | 0.03–0.07  | 0.04                   | 55.7   | 0.02–0.07    | 0.03                    | 37.4   | 0.02–0.06    |
| t <sub>1/2</sub> , h                      | 14.3                     | 75.1   | 4.0–29.4   | 13.8                   | 64.5   | 7.5–43.9     | 13.1 <sup>a</sup>       | 35.9   | 7.5–19.6     |
| t <sub>max</sub> , h                      | 2.5 <sup>b</sup>         | –      | 0.5–8.0    | 2.0 <sup>b</sup>       | –      | 0.6–2.9      | 1.9 <sup>b</sup>        | –      | 0.7–8.0      |

<sup>a</sup>n = 8.

<sup>b</sup>Median.

The geometric means (standard deviation) are shown.

AUC = area under the plasma concentration–time curve from zero to infinity; AUC/D = AUC/dose; AUC<sub>norm</sub> = area under the plasma concentration–time curve divided by dose per kg body weight; C<sub>max</sub> = peak plasma concentration; C<sub>max</sub>/D = C<sub>max</sub>/dose; CV = coefficient of variation; t<sub>max</sub> = time to reach maximum drug concentration in plasma; t<sub>1/2</sub> = half-life.

*Online supplements are not copyedited prior to posting.*
